# Supplementary material
Source: publisher figshare collection journal article supplement (https://tandf.figshare.com/ndownloader/files/17281766)
Supplement: Supplementary file 1 [file 17281766]

## Supplemental file

Activated *Hordeum Vugare* L. dust as carbon paste electrode modifier for the sensitive electrochemical detection of  $\text{Cd}^{2+}$ ,  $\text{Pb}^{2+}$  and  $\text{Hg}^{2+}$  ions

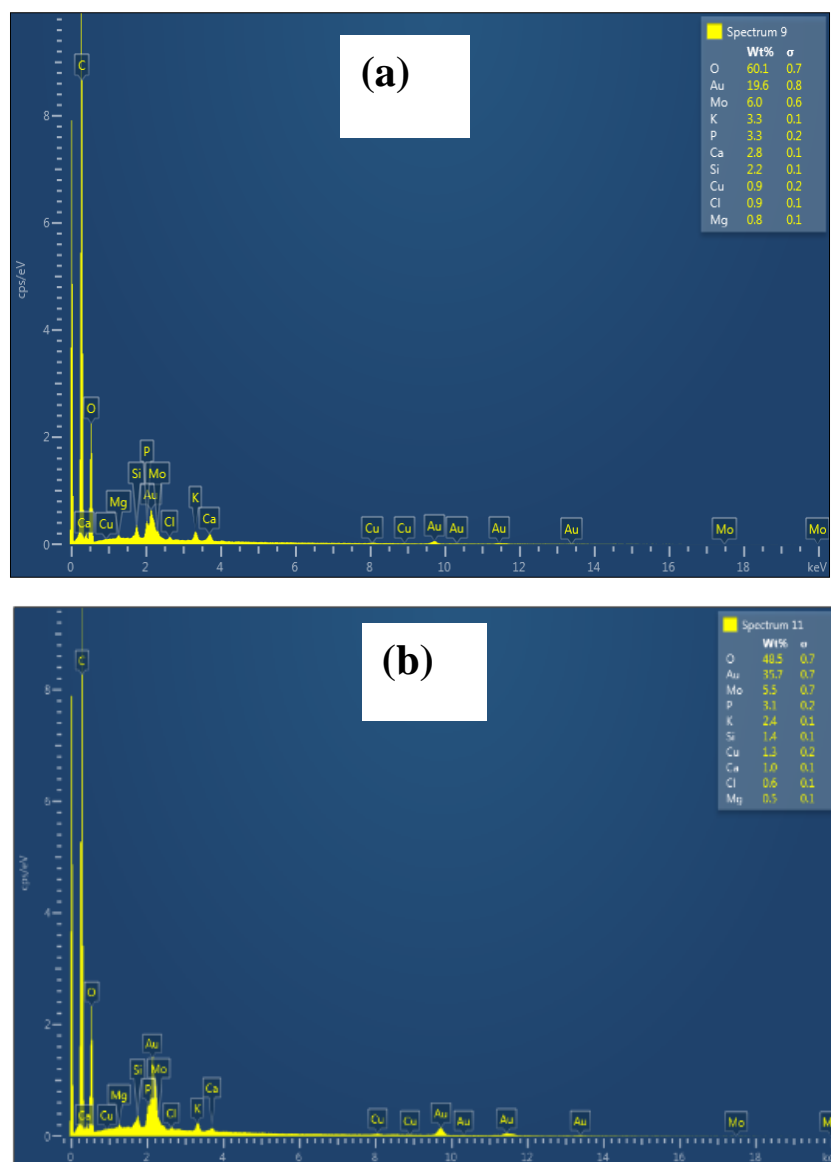

Figure SI 1: EDX curves of (a) HVW and (b) HVW- $\text{Na}_2\text{CO}_3$  materials.

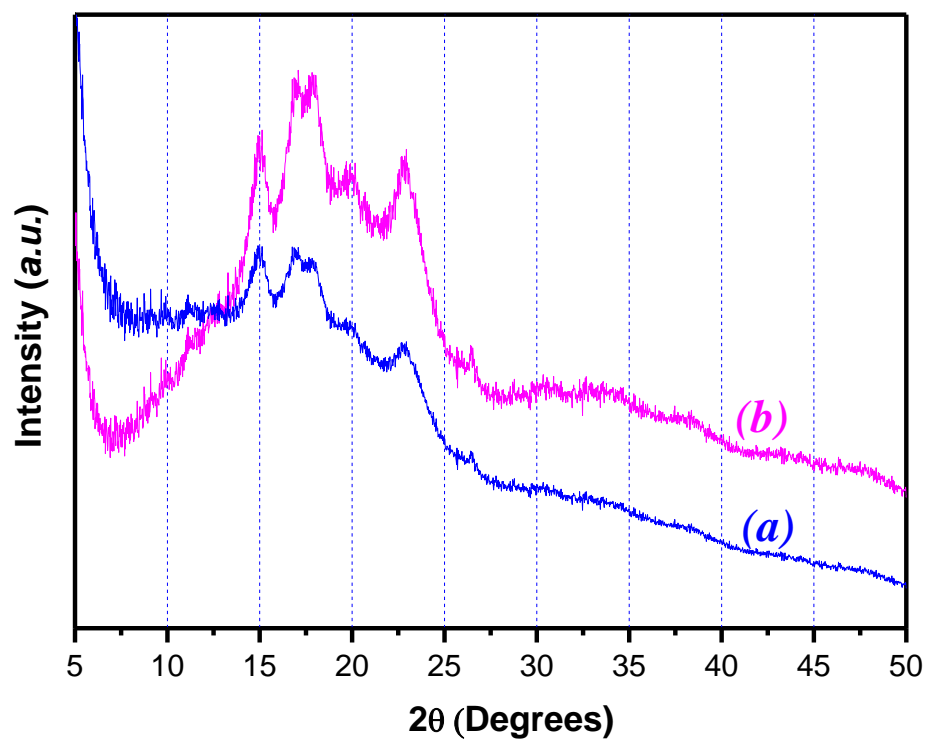

**Figure SI 2:** XRD patterns of (a) HVW and (b) HVW- $\text{Na}_2\text{CO}_3$  materials.

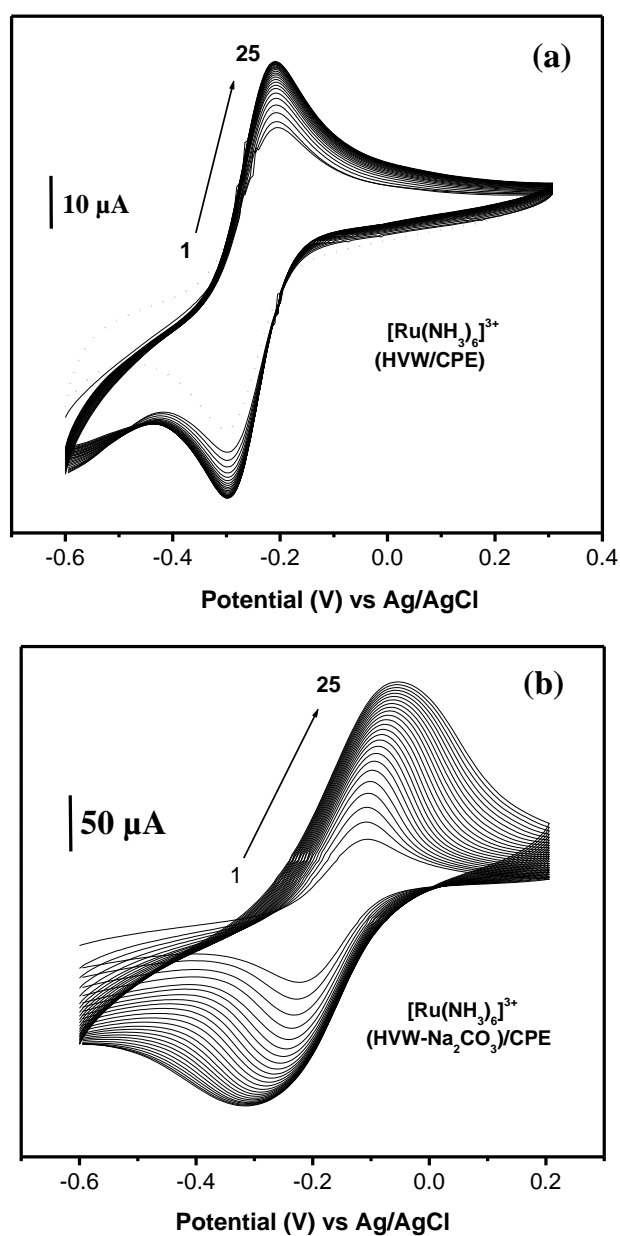

**Figure SI 3:** Cyclic voltammograms recorded at 50 mV s<sup>-1</sup> in 0.1 M KCl (pH 7) + 1 mM  $[\text{Ru}(\text{NH}_3)_6]^{3+}$  using (a): HVW/CPE and (b): HVW- $\text{Na}_2\text{CO}_3$ /CPE. The dotted line in (a) represents the signal of  $[\text{Ru}(\text{NH}_3)_6]^{3+}$  on the UMCPE.

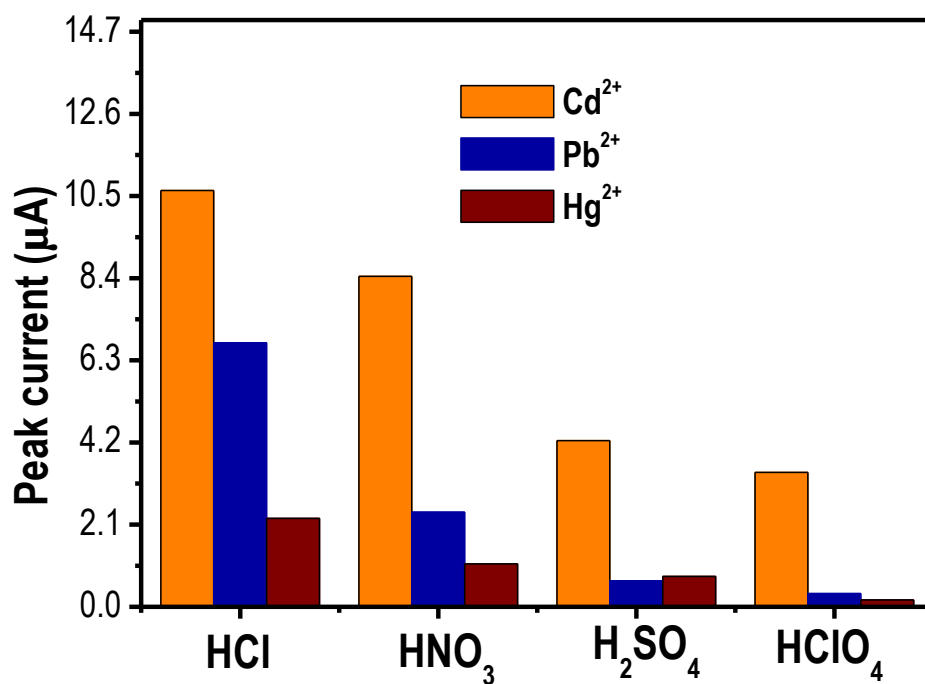

**Figure SI 4:** Effect of the nature of stripping medium on the DPV curves of  $5 \times 10^{-5}$  M Cd<sup>2+</sup>,  $10^{-5}$  M Pb<sup>2+</sup> and  $10^{-5}$  M Hg<sup>2+</sup>. Accumulation was performed on HVW-Na<sub>2</sub>CO<sub>3</sub>/CPE for 3 min in aqueous solution (pH 6.5) followed by detection in each acidic solution (concentration: 0.1 M).

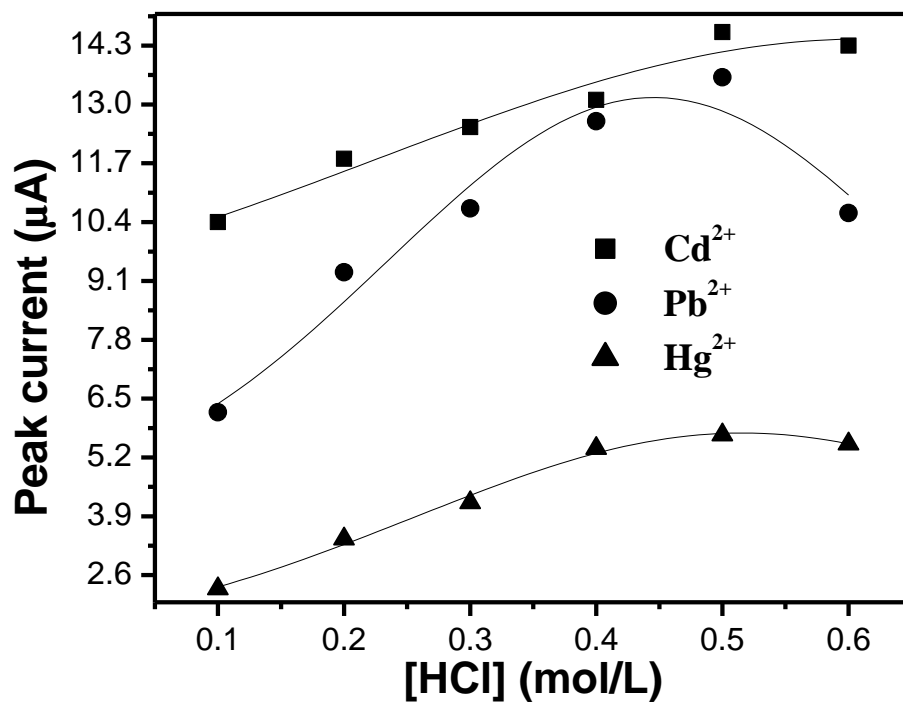

**Figure SI 5:** Effect of the acidity of the stripping medium (HCl) on the electrochemical response on HVW- $\text{Na}_2\text{CO}_3$ /CPE of  $5 \times 10^{-5}$  M  $\text{Cd}^{2+}$ ,  $10^{-5}$  M  $\text{Pb}^{2+}$  and  $10^{-6}$  M  $\text{Hg}^{2+}$  after 3 min accumulation in aqueous solution (pH 6.5). Detection in HCl upon 60 s electrolysis at -1.0 V

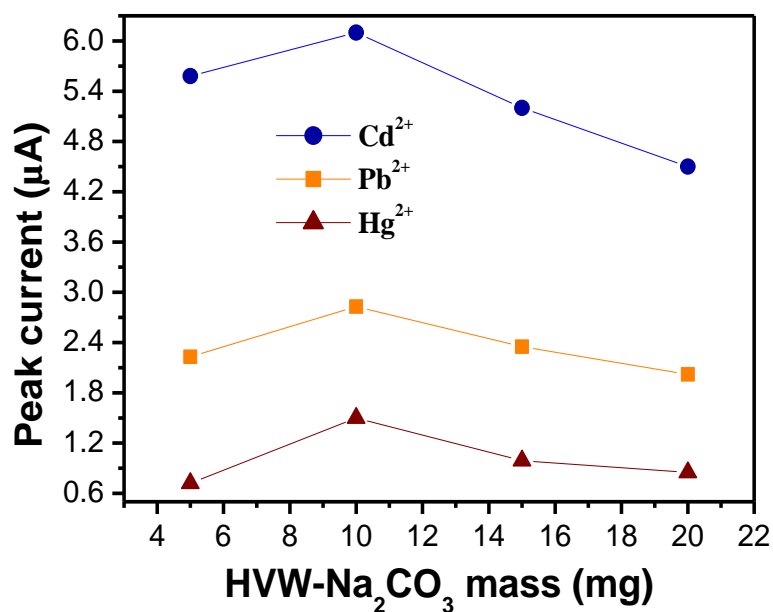

**Figure SI 6:** Effect of variation HVW-Na<sub>2</sub>CO<sub>3</sub> mass on current response of HVW-Na<sub>2</sub>CO<sub>3</sub>/CPE upon 3 min preconcentration in aqueous solution (pH 6.5) with  $5 \times 10^{-5}$  M Cd<sup>2+</sup>,  $10^{-5}$  M Pb<sup>2+</sup> and  $10^{-5}$  M Hg<sup>2+</sup>. Detection in 0.5 M HCl after 60 s electrolysis at -1.0 V.

**Table SI 1.** Carbon paste electrodes' composition (weight percentages) used in this work

| Electrode constituent                   | Mass (mg)  |             |             |             |
|-----------------------------------------|------------|-------------|-------------|-------------|
| Graphite (A)                            | 65         | 60          | 55          | 50          |
| Silicon oil (B)                         | 30         | 30          | 30          | 30          |
| HVW-Na <sub>2</sub> CO <sub>3</sub> (C) | 5          | 10          | 15          | 20          |
| *CPE composition (%A/%B/%C)             | 65%/30%/5% | 60%/30%/10% | 55%/30%/15% | 50%/30%/20% |

\*CPE: Carbon Paste electrode
